# Supplementary material for: COVID-19-mandated social restrictions unveil the impact of social time pressure on sleep and body clock
Source: PubMed Central journal article supplement (PMC7746700; doi:10.1038/s41598-020-79299-7), 2020-12-17
Supplement: 41598_2020_79299_MOESM1_ESM.pdf [file 41598_2020_79299_MOESM1_ESM.pdf]

## Supplementary Information: COVID-19-mandated social restrictions unveil the impact of social time pressure on sleep and body clock

Maria Korman, Vadim Tkachev, Cátia Reis, Yoko Komada, Shingo Kitamura, Denis Gubin, Vinod Kumar, Till Roenneberg

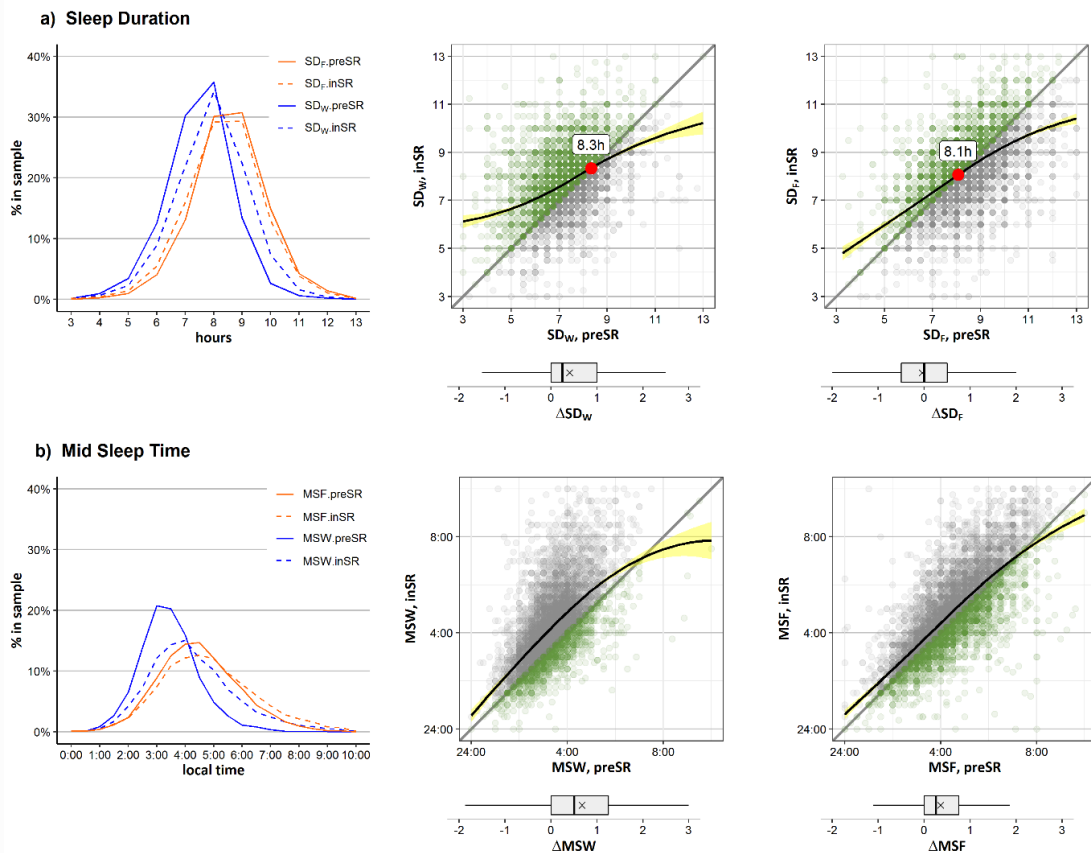

**SI-Figure 1.** Social restriction-induced changes (*preSR* → *inSR*) in sleep-wake behavior in the general sample. **a) Sleep Duration** (hours) on workdays ( $SD_w$ ) and free days ( $SD_f$ ); and **b) Mid-Sleep time** (local time) on work ( $MSW$ ) and work-free ( $MSF$ ). For each parameter, distribution in the sample (smooth line – *preSR*; dashed line – *inSR*, blue -  $SD_w/MSW$ , orange –  $SD_f/MSF$ ), scatterplots of individual values and boxplots of individual differences ( $\Delta$ , hours) are presented. Overlapping dots are coded by color intensity. Diagonal line in the scatter plots designates no restriction-induced change in parameter. Green – increase/delay, grey – decrease/advance. Black LOESS regression lines illustrate the relationship between the parameter values *preSR* (x-axis) and the smoothed parameter values *inSR* (y-axis), pointwise 95%-confidence intervals are visualized by bands shaded in yellow. Red dot – intersection point between the diagonal and the LOESS line. In the boxplots: positive values – increase in  $SD_w/SD_f$ , delay in  $MSW/MSF$ ; whiskers - max and min values, box borders – 75th and 25th percentiles, line through the box – median, x marker - mean.

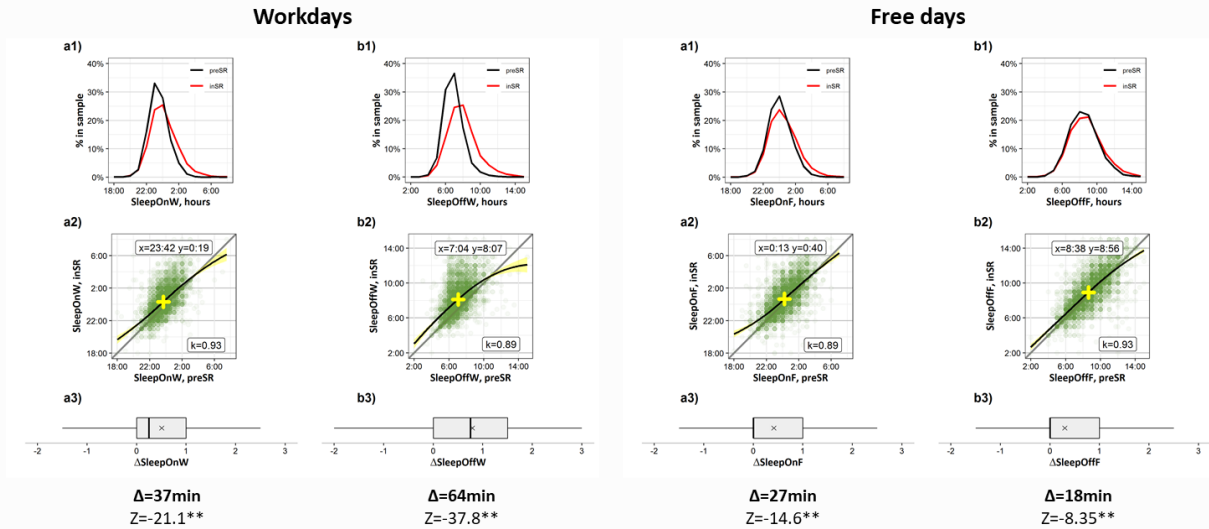

**SI-Figure 2.** Social restriction-induced changes (*preSR*  $\rightarrow$  *inSR*) in sleep onset and sleep offset times on workdays and free days (local time). **Distribution in the sample** (black line – *preSR*; red line – *inSR*): **a1)** Sleep onset on workdays/free days – SleepOnW/SleepOnF; **b1)** Sleep offset on workdays/free days – SleepOffW/SleepOffF. **Scatterplots of individual values:** **a2)** Sleep onset on workdays/free days – SleepOnW/SleepOnW; **b2)** Sleep offset on workdays/free days – SleepOffW/SleepOffW. Black LOESS regression lines illustrate the relationship between the parameter values *preSR* (x-axis) and the smoothed parameter values *inSR* (y-axis), pointwise 95%-confidence intervals are visualized by bands shaded in yellow. Yellow cross coordinates – mean of *MSF<sub>sc</sub>* *preSR* (x-axis) and *inSR* (y-axis). *k* – slope of the tangent for the LOESS regression line at the point of mean value. **Boxplots of individual differences** ( $\Delta$ , hours): **a3)**  $\Delta$ SleepOnW/ $\Delta$ SleepOnF; **b3)**  $\Delta$ SleepOffW/ $\Delta$ SleepOffW. Positive values – delay in onset or offset times; whiskers - max and min values, box borders – 75th and 25th percentiles, line through the box – median,  $\times$  marker - mean. Mean  $\Delta$  in minutes and Z statistic of the Wilcoxon Signed Ranks two-tailed tests (*preSR*  $\rightarrow$  *inSR*) for each parameter are shown below the boxplots. **\*\*p < 0.001.**

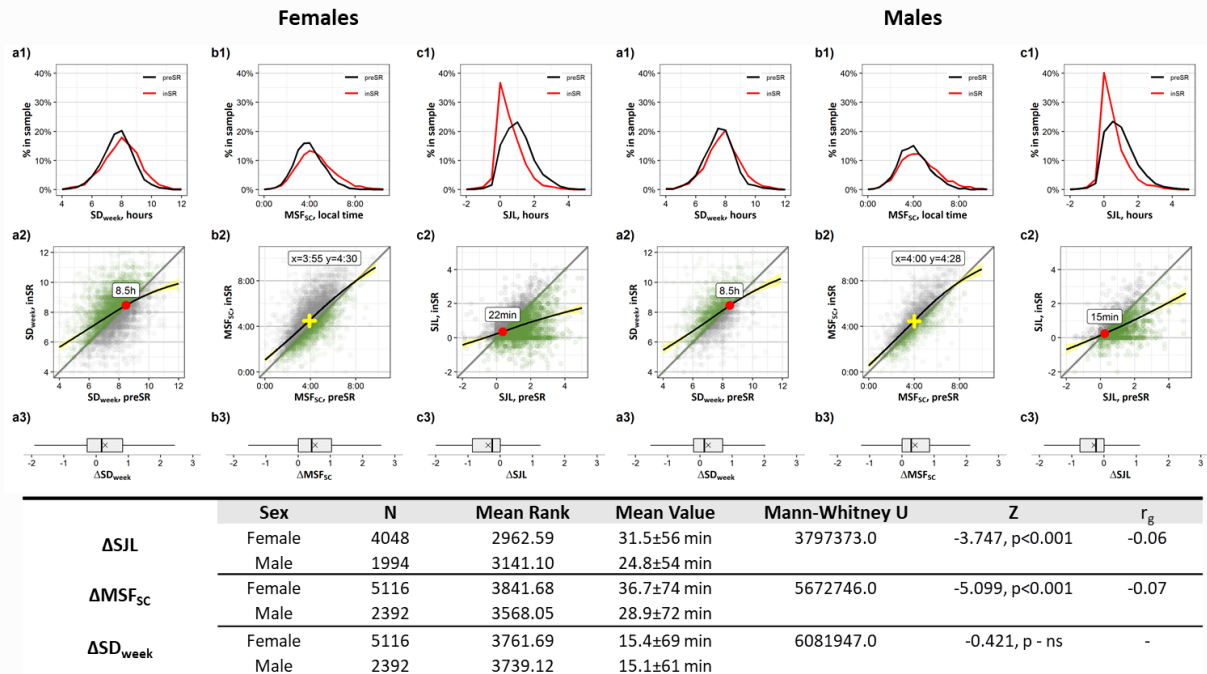

**SI-Figure 3.** Social restriction-induced changes (*preSR* → *inSR*) in sleep-wake behavior by sex, females comprise 68.2% of the study sample. **Panels a1-c1** - Distributions of  $SD_{week}$  (hours),  $MSF_{sc}$  (chronotype, local time), and  $SJL$  (h), *preSR* (black line) and *inSR* (red line), percent from group (Females or Males) total. **Panels a2-c2** - Scatterplots of  $SD_{week}$  (hours),  $MSF_{sc}$  (chronotype, local time), and  $SJL$  (h), *preSR* (x axis) vs. *inSR* (y axis). Each dot represents an individual participant, overlapping dots are coded by color intensity. Diagonal line designates no restriction-induced change in parameter. Green – increase/advance, grey – decrease/delay. Black LOESS regression lines illustrate the relationship between the parameter values *preSR* (x-axis) and the smoothed parameter values *inSR* (y-axis), pointwise 95%-confidence intervals are visualized by bands shaded in yellow. Red dot – intersection point between the diagonal and the LOESS line. Yellow cross coordinates – mean of  $MSF_{sc}$  *preSR* (x-axis) and *inSR* (y-axis). **Panels a3-a3** – Boxplots of individual differences ( $\Delta$ , hours) in  $SD_{week}$ ,  $MSF_{sc}$  and  $SJL$ . Positive values – increase in  $SD_{week}$ , delay in  $MSF_{sc}$ . Negative values - decrease in  $SJL$ . Whiskers - max and min values, box borders – 75th and 25th percentiles, line through the box – median, × marker - mean. **Table** - Mann-Whitney U-test statistics of group comparisons. No differences between sex groups in  $\Delta SD_{week}$  were found; sex groups had minor but significant differences in  $\Delta MSF_{sc}$  (7.8 min, females have larger delay) and  $\Delta SJL$  (6.7 min, females have larger shift), with negligible effect sizes ( $r_g < 0.1$ ).

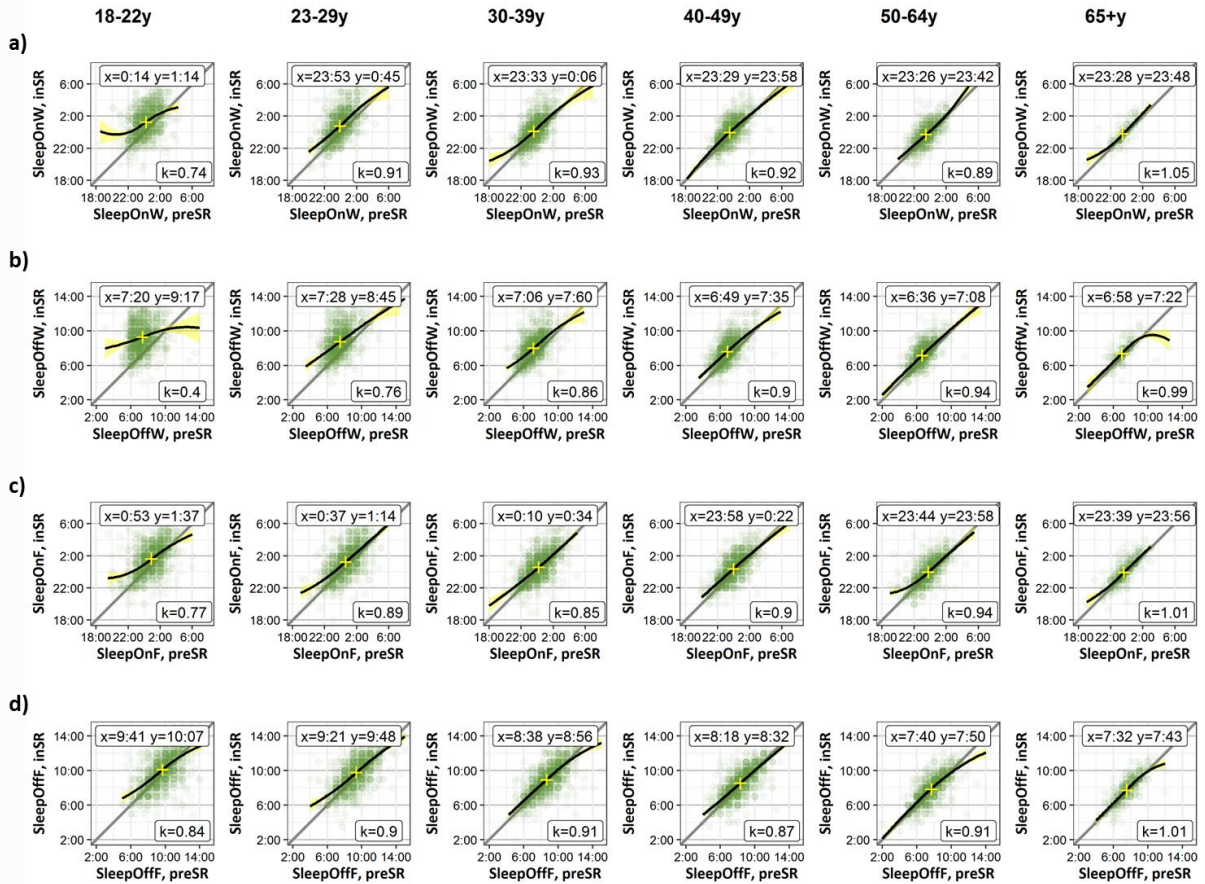

**SI-Figure 4.** Social restriction-induced changes (*preSR* → *inSR*) in sleep onset and sleep offset on work and work-free days by age-group (18-22y, 23-29y, 30-39y, 40-49y, 50-64y, and 65+y): **a) Sleep onset on workdays** – SleepOnW; **b) Sleep offset on workdays** – SleepOffW; **c) Sleep onset on free days** – SleepOnF; **d) Sleep offset on free days** – SleepOffF. Black LOESS regression lines illustrate the relationship between the parameter values *preSR* (x-axis, local time) and the smoothed parameter values *inSR* (y-axis, local time), pointwise 95%-confidence intervals are visualized by bands shaded in yellow. Yellow cross coordinates – mean of parameter *preSR* (x-axis) and *inSR* (y-axis). k – slope of the tangent for the LOESS regression line at the point of mean parameter value *preSR*.

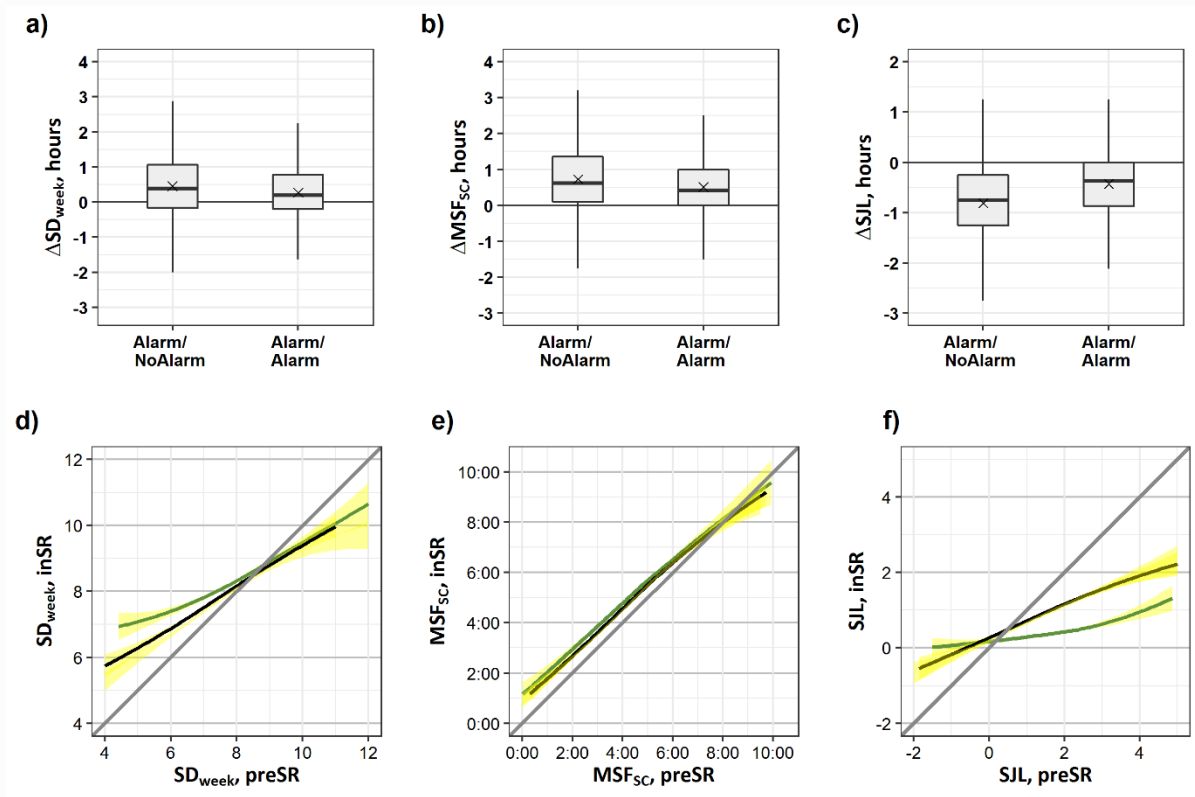

**SI-Figure 5.** The contribution of alarm clock use on work on changes in daily behavior in Alarm/NoAlarm and Alarm/Alarm groups. **Upper panel.** Boxplots of individual differences ( $\Delta$ , hours) in sleep-wake parameters according to alarm clock use inSR: Alarm/NoAlarm (N=1723) and Alarm/Alarm (N=3337) groups. **a)**  $SD_{week}$ , positive values – increase; **b)**  $MSF_{sc}$ , positive values – delay and **c)**  $SJL$ , positive values – increase, *preSR* and *inSR*. Note differences in scale and different number of participants in the groups. Whiskers - max and min values, box borders – 75<sup>th</sup> and 25<sup>th</sup> percentiles, line through the box – median, × marker - mean. **Lower panel.** Black LOESS regression lines by group, Alarm/NoAlarm (green lines) and Alarm/Alarm (black lines), **d)**  $SD_{week}$  (hours), **e)**  $MSF_{sc}$  (chronotype, local time), and **f)**  $SJL$  (hours), *preSR* (x axis) vs. *inSR* (y axis). Note that in alarm and no-alarm clock users, the intersection points are roughly the same, suggesting that the differences obtained between the groups are due to use of alarm clock.

***SI Table 1. Sociodemographic details, General sample***

| <b>N</b>                                   | <b>7517</b> |
|--------------------------------------------|-------------|
| <b>Sex</b>                                 |             |
| Male                                       | 32%         |
| Female                                     | 68%         |
| <b>Age</b>                                 |             |
| Mean                                       | 38.5        |
| SD                                         | 14.8        |
| <b>Age Group</b>                           |             |
| 18-22y                                     | 16%         |
| 23-29y                                     | 18%         |
| 30-39y                                     | 22%         |
| 40-49y                                     | 20%         |
| 50-64y                                     | 17%         |
| 65+y                                       | 6%          |
| <b>Alarm clock usage on workdays</b>       |             |
| preSR                                      | 77%         |
| inSR                                       | 45%         |
| <b>Employed/Student</b>                    |             |
| preSR                                      | 92%         |
| inSR                                       | 81%         |
| <b>Work/Study from home</b>                |             |
| preSR                                      | 11%         |
| inSR                                       | 66%         |
| <b>Days from social restrictions onset</b> |             |
| Mean                                       | 32.7        |
| SD                                         | 9.1         |

## Top countries (N)

---

Russia 1089

Japan 1080

Portugal 860

India 766

US 729

Italy 628

UK 417

Israel 341

Germany 320

Brazil 142

**Distribution of GCCS respondents.** The heat map was generated in Excel (Microsoft Office 10) using Bing Map app according to the geographical data reported by the participants (country and ZIP code).

---

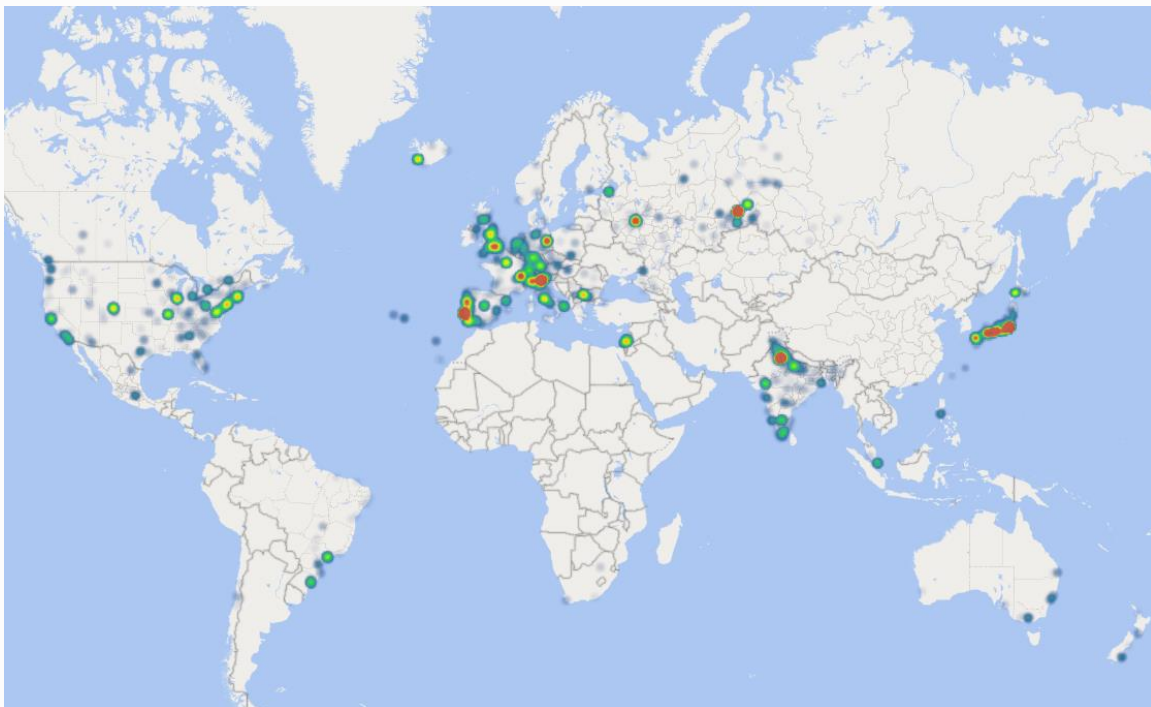

***SI Table 2. Sociodemographic details, Age groups***

|                                                       | <b>18-22y</b> | <b>23-29y</b> | <b>30-39y</b> | <b>40-49y</b> | <b>50-64y</b> | <b>65+y</b> |
|-------------------------------------------------------|---------------|---------------|---------------|---------------|---------------|-------------|
| <b>N</b>                                              | 1225          | 1340          | 1660          | 1515          | 1312          | 456         |
| <b>Sex</b>                                            |               |               |               |               |               |             |
| <b>Male</b>                                           | 25%           | 30%           | 33%           | 32%           | 35%           | 45%         |
| <b>Female</b>                                         | 75%           | 70%           | 67%           | 68%           | 65%           | 55%         |
| <b>Age (years)</b>                                    |               |               |               |               |               |             |
| <b>Mean</b>                                           | 20            | 25.8          | 34.3          | 44.3          | 56.1          | 70.4        |
| <b>SD</b>                                             | 1.4           | 2             | 2.9           | 2.9           | 4.2           | 4.8         |
| <b>Mean MSF<sub>sc</sub> (chronotype, local time)</b> |               |               |               |               |               |             |
| <b>preSR</b>                                          | 4:39          | 4:33          | 4:01          | 3:46          | 3:26          | 3:30        |
| <b>inSR</b>                                           | 5:39          | 5:16          | 4:31          | 4:14          | 3:44          | 3:46        |
| <b>Alarm clock usage on workdays</b>                  |               |               |               |               |               |             |
| <b>preSR</b>                                          | 89%           | 86%           | 80%           | 81%           | 66%           | 23%         |
| <b>inSR</b>                                           | 42%           | 53%           | 50%           | 50%           | 41%           | 12%         |
| <b>Employed/Student</b>                               |               |               |               |               |               |             |
| <b>preSR</b>                                          | 99%           | 97%           | 93%           | 95%           | 89%           | 48%         |
| <b>inSR</b>                                           | 86%           | 87%           | 83%           | 84%           | 79%           | 42%         |



**18-22y      23-29y      30-39y      40-49y      50-64y      65+y**

**Ratio (Alarm clock usage / Employed)**

|              |      |      |      |      |      |      |
|--------------|------|------|------|------|------|------|
| <b>preSR</b> | 0.90 | 0.89 | 0.86 | 0.85 | 0.74 | 0.48 |
| <b>inSR</b>  | 0.49 | 0.61 | 0.60 | 0.60 | 0.52 | 0.29 |

**Work/Study from home**

|              |     |     |     |     |     |     |
|--------------|-----|-----|-----|-----|-----|-----|
| <b>preSR</b> | 12% | 10% | 10% | 11% | 11% | 16% |
| <b>inSR</b>  | 70% | 75% | 71% | 66% | 60% | 32% |

**Days from social restrictions onset**

|             |      |      |      |      |      |      |
|-------------|------|------|------|------|------|------|
| <b>Mean</b> | 34.4 | 33.2 | 32.4 | 31.4 | 32.1 | 34.1 |
| <b>SD</b>   | 7    | 8.8  | 9.6  | 9.5  | 9.6  | 10.2 |

**Top countries (N)**

|             |              |              |              |              |             |
|-------------|--------------|--------------|--------------|--------------|-------------|
| Russia 350  | India 204    | Portugal 213 | Portugal 275 | Japan 249    | US 106      |
| India 281   | US 182       | Russia 210   | Russia 249   | US 158       | Italy 105   |
| Japan 260   | Russia 138   | Japan 194    | Japan 220    | Italy 155    | Japan 39    |
| Portugal 67 | Portugal 122 | US 135       | US 110       | Portugal 153 | Israel 37   |
| Italy 65    | Japan 118    | India 130    | UK 92        | Russia 108   | Russia 34   |
| UK 43       | Italy 91     | Italy 123    | Italy 89     | UK 83        | Portugal 30 |

***SI Table 3. Sociodemographic details, Alarm/NoAlarm vs. Alarm/Alarm group***

|                                            | <b>Alarm/NoAlarm</b> | <b>Alarm/Alarm</b> |
|--------------------------------------------|----------------------|--------------------|
| <b>N</b>                                   | 1539                 | 2596               |
| <b>Sex</b>                                 |                      |                    |
| Male                                       | 31%                  | 31%                |
| Female                                     | 69%                  | 69%                |
| <b>Age (years)</b>                         |                      |                    |
| Mean                                       | 35                   | 35.2               |
| SD                                         | 13.2                 | 12.2               |
| <b>Age Group</b>                           |                      |                    |
| 18-22y                                     | 23%                  | 16%                |
| 23-29y                                     | 20%                  | 23%                |
| 30-39y                                     | 22%                  | 25%                |
| 40-49y                                     | 19%                  | 21%                |
| 50-64y                                     | 14%                  | 13%                |
| 65+y                                       | 2%                   | 1%                 |
| <b>Alarm clock usage on workdays</b>       |                      |                    |
| preSR                                      | 100%                 | 100%               |
| inSR                                       | 0%                   | 100%               |
| <b>Employed/Student</b>                    |                      |                    |
| preSR                                      | 100%                 | 100%               |
| inSR                                       | 100%                 | 100%               |
| <b>Work/Study from home</b>                |                      |                    |
| preSR                                      | 12%                  | 12%                |
| inSR                                       | 100%                 | 100%               |
| <b>Days from social restrictions onset</b> |                      |                    |
| Mean                                       | 32.4                 | 33.1               |

SD

8.3

9.5

**Top countries (N)**

---

Russia 291      Portugal 409

India 210      Japan 359

Portugal 170      Russia 315

US 157      US 290

Japan 125      Italy 222

UK 105      UK 166

Italy 71      Germany 125

Germany 67      India 125

Israel 44      Israel 72

Switzerland 40      Switzerland 68

**SI Table 4.** Comparisons between the deltas [*inSR-preSR*] of the main outcome measures of daily behaviors ( $\Delta SD_{week}$ ,  $\Delta MSF_{sc}$  and  $\Delta S JL$ ) in the three ad-hoc groups: people **working from home** ( $N = 4977$ , mean age 36.5+/-13.5 years), those that **worked not from home** ( $N = 1126$ , mean age 39.7+/-14.5 years), and those that **did not work** ( $N = 1414$ , mean age 44.5+/-17.6) inSR. Means of individual deltas  $\pm$  sd (hh:mm), Z statistic and p-value of the Mann-Whitney U tests for each parameter are shown (not corrected for the multiple comparisons). Note that there were significant differences in the mean age of the groups, this fact may bias the interpretation of the pairwise comparisons between the groups.

|                    | Work from home | Work not from home | Z     | p-value |
|--------------------|----------------|--------------------|-------|---------|
| $\Delta SD_{week}$ | 0:17+/-1:02    | 0:12+/-1:02        | 3.15  | 0.002   |
| $\Delta MSF_{sc}$  | 0:34+/-1:10    | 0:20+/-1:07        | 10.7  | < 0.001 |
| $\Delta S JL$      | -1:28+/-0:55   | -1:44+/-0:56       | -11.7 | < 0.001 |
| <b>age</b>         | 36.5+/-13.5    | 39.7+/-14.5        | -6.72 | < 0.001 |

|                    | Work from home | Don't work  | Z     | p-value |
|--------------------|----------------|-------------|-------|---------|
| $\Delta SD_{week}$ | 0:17+/-1:02    | 0:11+/-1:21 | 3.74  | < 0.001 |
| $\Delta MSF_{sc}$  | 0:34+/-1:10    | 0:45+/-1:27 | -2.9  | 0.004   |
| $\Delta S JL$      | -1:28+/-0:55   | -           | -     | -       |
| <b>age</b>         | 36.5+/-13.5    | 44.5+/-17.6 | -14.7 | < 0.001 |

|                    | Work not from home | Don't work  | Z     | p-value |
|--------------------|--------------------|-------------|-------|---------|
| $\Delta SD_{week}$ | 0:12+/-1:02        | 0:11+/-1:21 | 0.879 | 0.379   |
| $\Delta MSF_{sc}$  | 0:20+/-1:07        | 0:45+/-1:27 | -10.2 | < 0.001 |
| $\Delta S JL$      | -1:44+/-0:56       | -           | -     | -       |
| <b>age</b>         | 39.7+/-14.5        | 44.5+/-17.6 | -6.34 | < 0.001 |

**SI Table 5.** Main outcome measures of daily behaviors (mean  $\pm$  sd) in six top countries of the GCCS sample **preSR** and **inSR**: sleep duration,  $SD_{week}$ , corrected mid-sleep time on free days,  $MSF_{sc}$  (chronotype), and social jetlag,  $SJL$ . Z statistic and p-value of the Wilcoxon Signed Ranks two-tailed tests ( $preSR \rightarrow inSR$ ) and  $\Delta$  [**inSR-preSR**] for each parameter are shown.

|                 | <i>preSR</i> | <i>inSR</i> | Z     | p-value | $\Delta$ [ <b>inSR-preSR</b> ] |
|-----------------|--------------|-------------|-------|---------|--------------------------------|
| <b>Russia</b>   |              |             |       |         |                                |
| <b>N = 1089</b> |              |             |       |         |                                |
| $SD_{week}$     | 7:40+/-1:09  | 8:21+/-1:18 | -13.5 | < 0.001 | 0:41+/-1:21                    |
| $MSF_{sc}$      | 4:15+/-1:24  | 5:07+/-1:56 | -11.3 | < 0.001 | 0:52+/-1:25                    |
| $SJL$           | 1:29+/-1:01  | 0:33+/-0:52 | 20.6  | < 0.001 | -1:03+/-1:09                   |
| <b>Japan</b>    |              |             |       |         |                                |
| <b>N = 1080</b> |              |             |       |         |                                |
| $SD_{week}$     | 6:58+/-1:03  | 7:12+/-1:12 | -4.59 | < 0.001 | 0:13+/-0:57                    |
| $MSF_{sc}$      | 4:01+/-1:25  | 4:17+/-1:54 | -2.35 | 0.018   | 0:15+/-1:09                    |
| $SJL$           | 0:55+/-0:55  | 0:39+/-0:50 | 8.16  | < 0.001 | -1:44+/-0:51                   |
| <b>Portugal</b> |              |             |       |         |                                |
| <b>N = 860</b>  |              |             |       |         |                                |
| $SD_{week}$     | 7:49+/-0:55  | 7:59+/-1:10 | -4.2  | < 0.001 | 0:10+/-1:02                    |
| $MSF_{sc}$      | 4:26+/-1:08  | 5:08+/-1:24 | -10.8 | < 0.001 | 0:41+/-1:01                    |
| $SJL$           | 1:13+/-0:50  | 0:47+/-0:44 | 11.1  | < 0.001 | -1:33+/-0:47                   |
| <b>India</b>    |              |             |       |         |                                |
| <b>N = 766</b>  |              |             |       |         |                                |
| $SD_{week}$     | 7:41+/-1:12  | 7:50+/-1:17 | -2.03 | 0.042   | 0:08+/-1:19                    |
| $MSF_{sc}$      | 3:46+/-1:39  | 4:35+/-2:01 | -7.74 | < 0.001 | 0:48+/-1:37                    |
| $SJL$           | 0:48+/-1:04  | 0:13+/-0:42 | 13.2  | < 0.001 | -1:26+/-1:06                   |
| <b>US</b>       |              |             |       |         |                                |
| <b>N = 729</b>  |              |             |       |         |                                |
| $SD_{week}$     | 8:05+/-0:57  | 8:16+/-1:09 | -3.4  | < 0.001 | 0:10+/-0:59                    |
| $MSF_{sc}$      | 3:38+/-1:27  | 4:09+/-1:46 | -5.53 | < 0.001 | 0:31+/-1:04                    |
| $SJL$           | 0:59+/-0:53  | 0:38+/-0:46 | 8.09  | < 0.001 | -1:39+/-0:52                   |
| <b>Italy</b>    |              |             |       |         |                                |
| <b>N = 628</b>  |              |             |       |         |                                |
| $SD_{week}$     | 7:43+/-0:56  | 7:51+/-1:05 | -3.05 | 0.002   | 0:07+/-0:58                    |
| $MSF_{sc}$      | 4:07+/-1:13  | 4:23+/-1:21 | -3.85 | < 0.001 | 0:16+/-0:52                    |
| $SJL$           | 1:10+/-0:55  | 0:38+/-0:43 | 10.2  | < 0.001 | -1:29+/-0:46                   |
